# Supplementary material for: The Effect of a Single Bout of Continuous Aerobic Exercise on Glucose, Insulin and Glucagon Concentrations Compared to Resting Conditions in Healthy Adults: A Systematic Review, Meta-Analysis and Meta-Regression
Source: Sports Med. 2021 Apr 27;51(9):1949–66. doi: 10.1007/s40279-021-01473-2 (PMC8363558; doi:10.1007/s40279-021-01473-2)
Supplement: Supplementary file 2 — Supplementary file2 (DOCX 27 kb) [file 40279_2021_1473_MOESM2_ESM.docx]

**Title**

The effect of a single bout of continuous aerobic exercise on glucose, insulin and glucagon concentrations compared to resting conditions in non-diabetic adults: A systematic review, meta-analysis and meta-regression.

**Journal**

Sports Medicine

**Authors**

James Frampton1, 2*, Benjamin Cobbold1, Mikhail Nozdrin1, Htet T. H. Oo1, Holly Wilson1, Kevin G. Murphy2, Gary Frost1, Edward S. Chambers1

1Section for Nutrition Research, Department of Metabolism, Digestion and Reproduction, Faculty of Medicine, Imperial College London, London W12 0NN, United Kingdom.

2Section of Endocrinology and Investigative Medicine, Department of Metabolism, Digestion and Reproduction, Faculty of Medicine, Imperial College London, London W12 0NN, United Kingdom

***Corresponding Author**

James Frampton

Department of Metabolism, Digestion and Reproduction,

Faculty of Medicine,

Imperial College London,

London W12 0NN

United Kingdom

Email: j.frampton17@imperial.ac.uk

**DECLARATIONS**

**Funding**

No sources of financial assistance were used to conduct this study or to assist in the preparation of the manuscript. The Section of Endocrinology and Investigative Medicine is funded by grants from the MRC, BBSRC and NIHR, and is supported by the NIHR Biomedical Research Centre Funding Scheme. J.F is funded by the Imperial College London President’s PhD Scholarship.

**Conflicts of interest**

James Frampton, Benjamin Cobbold, Mikhail Nozdrin, Htet Oo, Holly Wilson, Kevin Murphy, Gary Frost and Edward Chambers declare that they have no conflicts of interest relevant to the content of this review.

**Availability of Data and Material**

Please contact the corresponding author for data requests.

**Author Contributions**

J.F and E.S.C conceived and designed the study. J.F performed databases searches. J.F, B.C, M.N, H.T.H.O and H.W participated in the screening process. J.F extracted data and performed all statistical analyses. J.F, E.S.C, K.G.M and G.F interpreted results of the analysis. J.F. wrote the initial draft of the manuscript, and critically revised by E.S.C, K.G.M and G.F. All authors read and approved the final manuscript.

**Electronic Supplementary Material Appendix S2:** Risk of bias summary for all included studies.

|  | Glucose | Insulin | Glucagon | (1) | (2) | (3) | (4) | (5) | Overall bias |
| --- | --- | --- | --- | --- | --- | --- | --- | --- | --- |
| Bahr et al., 1991 | ✓ | ✗ | ✗ | ? | + | + | + | + | ? |
| Balaguera-Cortes et al., 2011 | ✓ | ✓ | ✗ | ? | + | + | + | + | ? |
| Bergfors et al., 2005 | ✓ | ✓ | ✗ | ? | + | + | + | + | ? |
| Broom et al., 2017a | ✓ | ✓ | ✗ | ? | + | + | + | + | ? |
| Broom et al., 2017b | ✓ | ✓ | ✗ | ? | + | + | + | + | ? |
| Burns et al., 2007 | ✓ | ✓ | ✗ | ? | + | + | + | + | ? |
| Charlot et al., 2011 | ✓ | ✗ | ✗ | ? | - | + | + | + | - |
| Clegg et al., 2007 | ✓ | ✗ | ✗ | ? | + | + | + | + | ? |
| Douglas et al., 2017a | ✓ | ✓ | ✗ | ? | + | + | + | + | ? |
| Douglas et al., 2017b | ✓ | ✓ | ✗ | ? | + | + | + | + | ? |
| Edinburgh et al., 2017 | ✓ | ✓ | ✗ | ? | + | + | + | + | ? |
| Enevoldsen et al., 2005 | ✓ | ✓ | ✗ | ? | + | + | + | + | ? |
| Ezell et al., 1999a | ✓ | ✓ | ✗ | ? | + | + | + | + | ? |
| Ezell et al., 1999b | ✓ | ✓ | ✗ | ? | + | + | + | + | ? |
| Ezell et al., 1999c | ✓ | ✓ | ✗ | ? | + | + | + | + | ? |
| Farah & Gill, 2013 | ✓ | ✓ | ✗ | + | + | + | + | + | + |
| Gonzalez et al., 2013a | ✓ | ✓ | ✗ | ? | + | + | + | + | ? |
| Gonzalez et al., 2013b | ✓ | ✓ | ✗ | ? | + | + | + | + | ? |
| Goto et al., 2011 | ✗ | ✓ | ✗ | ? | + | + | + | + | ? |
| Hagobian et al., 2013a | ✗ | ✓ | ✗ | ? | + | + | + | + | ? |
| Hagobian et al., 2013b | ✗ | ✓ | ✗ | ? | + | + | + | + | ? |
| Hardman & Aldred, 1995 | ✗ | ✓ | ✗ | ? | + | + | + | + | ? |
| Højbjerre et al., 2007a | ✓ | ✗ | ✗ | ? | + | + | + | + | ? |
| Højbjerre et al., 2007b | ✓ | ✗ | ✗ | ? | + | + | + | + | ? |
| Isacco et al., 2014a | ✓ | ✓ | ✗ | ? | + | + | + | + | ? |
| Isacco et al., 2014b | ✓ | ✓ | ✗ | ? | + | + | + | + | ? |
| King et al., 2010 | ✓ | ✓ | ✗ | ? | + | + | + | + | ? |
| Knudsen et al., 2013 | ✗ | ✓ | ✗ | ? | + | + | + | + | ? |
| Lee et al., 1991 | ✓ | ✗ | ✗ | ? | + | + | + | + | ? |
| Larsen et al. 2017 | ✗ | ✓ | ✓ | ? | + | + | + | + | ? |
| Marion-Latard et al., 2003 | ✓ | ✓ | ✗ | ? | + | + | + | + | ? |
| Mattin et al., 2018 | ✓ | ✓ | ✗ | ? | + | + | + | + | ? |
| McClean et al., 2007 | ✓ | ✗ | ✗ | ? | + | + | + | + | ? |
| Morris et al., 2010 | ✓ | ✓ | ✗ | ? | + | + | + | + | ? |
| Numao et al., 2008 | ✓ | ✓ | ✗ | ? | + | + | + | + | ? |
| Nyhoff et al., 2015 | ✓ | ✓ | ✓ | ? | + | + | + | + | ? |
| Petridou et al., 2004 | ✓ | ✓ | ✗ | ? | + | + | + | + | ? |
| Rattray & Smee, 2016 | ✓ | ✗ | ✗ | ? | + | + | + | + | ? |
| Ronsen et al., 2001 | ✗ | ✓ | ✗ | ? | + | + | + | + | ? |
| Ronsen et al., 2002 | ✓ | ✗ | ✗ | ? | + | + | + | + | ? |
| Schlierf et al., 1987 | ✓ | ✓ | ✗ | ? | + | + | + | + | ? |
| Shambrook et al., 2018 | ✓ | ✗ | ✗ | ? | + | + | + | + | ? |
| Shambrook et al., 2020 | ✓ | ✗ | ✗ | + | + | + | + | + | + |
| Siopi et al., 2019 | ✓ | ✓ | ✗ | ? | + | + | + | + | ? |
| Stokes et al., 2013 | ✓ | ✗ | ✗ | ? | + | + | + | + | ? |
| Tobin et al., 2007 | ✓ | ✓ | ✗ | ? | + | + | + | + | ? |
| Ueda et al., 2009 | ✓ | ✓ | ✗ | ? | + | + | + | + | ? |
| Ueda et al., 2009a | ✓ | ✓ | ✓ | ? | + | + | + | + | ? |
| Ueda et al., 2009b | ✓ | ✓ | ✓ | ? | + | + | + | + | ? |
| Vendelbo et al., 2010 | ✓ | ✓ | ✗ | ? | + | + | + | + | ? |
| Willis et al., 2019 | ✓ | ✓ | ✓ | ? | + | + | + | + | ? |

(1) Bias arising from the randomization process; (2) Bias due to deviations from intended interventions; (3) Bias due to missing outcome data; (4) Bias in measurement of the outcome; (5) Bias in the selection of the reported result; [-] high risk of bias; [?] unclear risk of bias; [+] low risk of bias. a,b,c denotes sub-studies.
